# Supplementary material for: The Combination of Sorafenib and PGV-1 Inhibits the Proliferation of Hepatocellular Carcinoma Through c-Myc Suppression in an Additive Manner: In Vitro Studies
Source: PubMed Central journal article supplement (PMC11614502; doi:10.1155/adpp/4297953), 2024-11-26

# Western Blot result

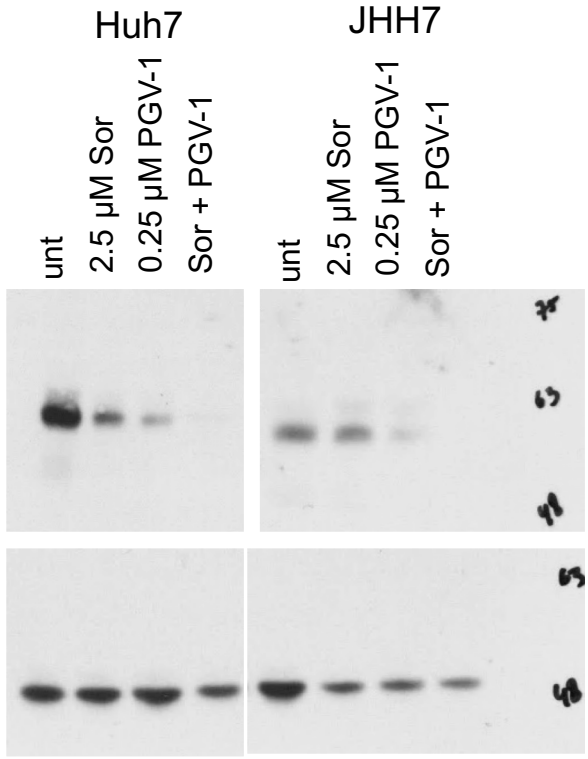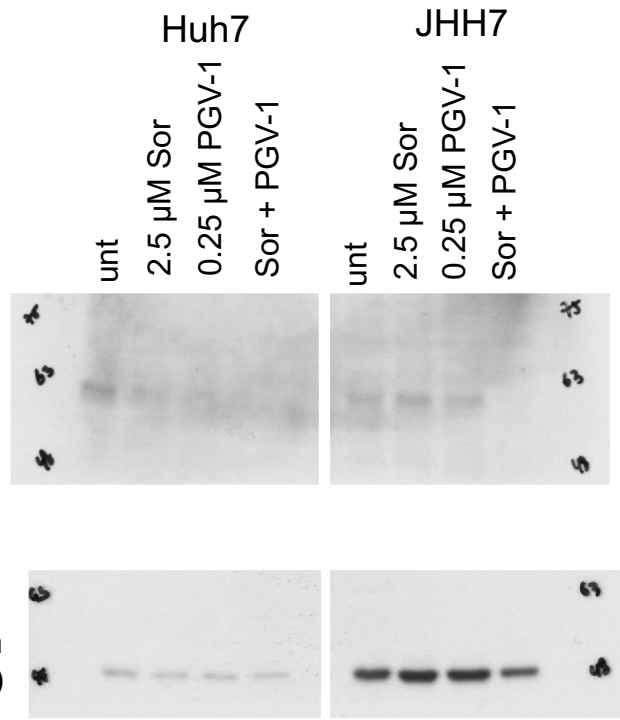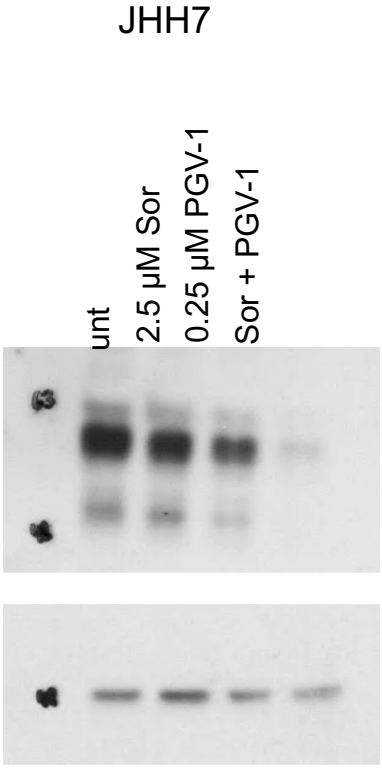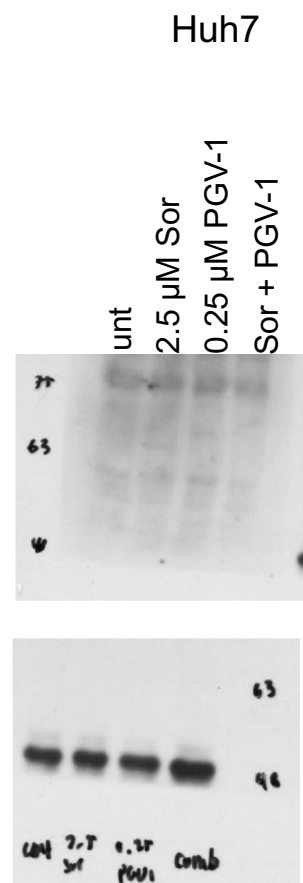

Supplement: 4297953.f1.pdf [file 4297953.f1.pdf]
